# Supplementary material for: NINscope, a versatile miniscope for multi-region circuit investigations
Source: eLife journal article supplement (doi:10.7554/elife.49987), 2020-01-14
Supplement: fig2-figsupp1-data1 [file Current (mA) vs. LED light power (mW) output NINscope.xlsx]

## Sheet: Measurement wo GRIN lens
Current (mA)	Measurement1	Measurement 2	Measurement 3	Mean of Measurements	Measurment 1 GRIN	Measurment 2 GRIN	Measurment 3 GRIN	Mean of measurements GRIN	Measurment 1 GRIN+relay	Measurment 2 GRIN+relay	Measurment 3 GRIN+relay	Mean of measurements GRIN+relay
2.38	0.12	0.12	0.13	0.123333	0.03	0.03	0.03	0.03	0.03	0.03	0.03	0.03
3.78	0.19	0.18	0.19	0.186667	0.08	0.08	0.09	0.0833333	0.06	0.06	0.06	0.06
5.18	0.24	0.23	0.26	0.243333	0.14	0.14	0.14	0.14	0.09	0.09	0.09	0.09
6.58	0.3	0.3	0.31	0.303333	0.19	0.19	0.2	0.193333	0.11	0.11	0.12	0.113333
7.98	0.38	0.35	0.39	0.373333	0.24	0.25	0.25	0.246667	0.14	0.15	0.15	0.146667
9.38	0.46	0.46	0.47	0.463333	0.29	0.31	0.31	0.303333	0.17	0.17	0.17	0.17
10.78	0.51	0.53	0.52	0.52	0.35	0.36	0.37	0.36	0.2	0.2	0.2	0.2
12.18	0.56	0.58	0.57	0.57	0.41	0.42	0.42	0.416667	0.22	0.22	0.23	0.223333
13.58	0.63	0.63	0.63	0.63	0.46	0.48	0.48	0.473333	0.25	0.25	0.26	0.253333
14.98	0.7	0.68	0.69	0.69	0.52	0.53	0.54	0.53	0.28	0.28	0.29	0.283333
16.38	0.76	0.76	0.75	0.756667	0.57	0.59	0.59	0.583333	0.3	0.31	0.32	0.31
17.78	0.82	0.8	0.82	0.813333	0.62	0.64	0.64	0.633333	0.33	0.33	0.34	0.333333
19.18	0.85	0.85	0.86	0.853333	0.68	0.69	0.7	0.69	0.36	0.36	0.37	0.363333
20.58	0.9	0.92	0.93	0.916667	0.73	0.74	0.75	0.74	0.38	0.39	0.4	0.39
21.98	0.99	0.99	0.99	0.99	0.78	0.79	0.81	0.793333	0.41	0.41	0.42	0.413333
34.58	1.52	1.54	1.55	1.53667	1.24	1.26	1.28	1.26	0.64	0.63	0.64	0.636667
44.38	1.88	1.88	1.88	1.88	1.57	1.6	1.63	1.6	0.81	0.8	0.83	0.813333
58.38	2.4	2.41	2.39	2.4	1.99	2.09	2.1	2.06	1.05	1.03	1.09	1.05667
89.18	3.3	3.37	3.34	3.33667	3	3.13	3.1	3.07667	1.56	1.53	1.59	1.56
